# Supplementary material
Source: PubMed Central journal article supplement (PMC5260487)
Supplement: NIHMS830730-supplement-01.pdf [file NIHMS830730-supplement-01.pdf]

Online Table 1. Relative hazards of atrial fibrillation per SD decrease in log-transformed heart rate variability measures from routine 10 seconds ECG

| Measure          | Model 1 |        |      | Model 2 |        |      | Model 3 |        |      |
|------------------|---------|--------|------|---------|--------|------|---------|--------|------|
|                  | HR      | 95% CI |      | HR      | 95% CI |      | HR      | 95% CI |      |
| Mean RR interval | 0.97    | 0.93   | 1.02 | 1.02    | 0.98   | 1.07 | 1.02    | 0.98   | 1.07 |
| Log (SDNN)       | 1.10    | 1.05   | 1.16 | 1.05    | 1.00   | 1.10 | 1.07    | 1.02   | 1.13 |
| Log (RMSSD)      | 1.05    | 1.01   | 1.10 | 1.03    | 0.99   | 1.07 | 1.05    | 1.00   | 1.10 |

\* Hazard ratios are expressed per SD (standard deviation) lower heart rate variability measures. Data from the Atherosclerosis Risk In Communities study with n = 11, 715, middle aged, biracial men and women followed for an average of 19.4 years. ECG = Electrocardiogram  
 Model 1 is adjusted for age, race, and gender  
 Model 2 is adjusted for adjusted for model 1 covariates, and prevalent coronary heart disease, diabetes, hypertension, prevalent heart failure, smoking status, alcohol intake, education level, LDL cholesterol, HDL cholesterol, study center, and body mass index.  
 Model 3 is adjusted for model 2 covariates, and heart rate (no change with additional adjustment of Cornell voltage).

| Online Table 2. Baseline characteristics of study participants by inclusion / exclusion status |                   |       |                    |       |         |
|------------------------------------------------------------------------------------------------|-------------------|-------|--------------------|-------|---------|
| Characteristics                                                                                | Excluded (n=4077) |       | Included (n=11715) |       | p-value |
|                                                                                                | Mean*             | SD    | Mean*              | SD    |         |
| Age (in years)                                                                                 | 54.4              | 5.9   | 54.1               | 5.7   | 0.003   |
| Male                                                                                           | 0.50              |       | 0.43               |       | <0.0001 |
| Caucasian                                                                                      | 0.68              |       | 0.75               |       | <0.0001 |
| Education                                                                                      |                   |       |                    |       | <0.0001 |
| Less than high school                                                                          | 0.27              |       | 0.23               |       |         |
| High school but less than college                                                              | 0.39              |       | 0.41               |       |         |
| College or professional                                                                        | 0.34              |       | 0.36               |       |         |
| Hypertension                                                                                   | 0.38              |       | 0.34               |       | <0.0001 |
| Diabetes                                                                                       | 0.14              |       | 0.11               |       | <0.0001 |
| Prevalent Coronary Heart Disease                                                               | 0.06              |       | 0.04               |       | <0.0001 |
| Prevalent Heart Failure                                                                        | 0.06              |       | 0.04               |       | <0.0001 |
| Current smoker                                                                                 | 0.28              |       | 0.26               |       | <0.0001 |
| Former Smoker                                                                                  | 0.32              |       | 0.32               |       | 0.46    |
| Cigarette-years of smoking                                                                     | 340.8             | 449.9 | 306.9              | 429.3 | <0.0001 |
| Usual ethanol intake (in grams/week)                                                           | 45.5              | 107.4 | 41.1               | 92.8  | 0.02    |
| LDL cholesterol (in mg/dL)                                                                     | 138.8             | 40.6  | 137.3              | 38.9  | 0.04    |
| HDL cholesterol (in mg/dL)                                                                     | 49.9              | 16.9  | 52.1               | 17.1  | <0.0001 |
| Body Mass Index (in Kg/meter* <sup>2</sup> meter)                                              | 28.1              | 5.5   | 27.6               | 5.3   | <0.0001 |
| Cornell voltage (mm)                                                                           | 12.6              | 5.7   | 12.2               | 5.5   | 0.001   |
|                                                                                                |                   |       |                    |       |         |
| Mean RR interval (milliseconds)                                                                | 908.5             | 141.8 | 906.0              | 136.6 | 0.48    |
| Log (SDNN)                                                                                     | 3.5               | 0.6   | 3.5                | 0.5   | 0.46    |
| Log (RMSSD)                                                                                    | 3.2               | 0.7   | 3.2                | 0.6   | 0.10    |
| Log (Low Frequency)                                                                            | 2.2               | 1.7   | 2.7                | 1.4   | <0.0001 |
| Log (High Frequency)                                                                           | 1.8               | 1.6   | 2.1                | 1.3   | <0.0001 |
| Log (LF/HF)                                                                                    | 0.4               | 1.0   | 0.6                | 0.9   | <0.0001 |
|                                                                                                |                   |       |                    |       |         |
| CHARGE AF risk score (expressed as %)                                                          | 2.9               | 3.4   | 2.5                | 2.8   | <0.0001 |
| *** some of the excluded are missing variable values                                           |                   |       |                    |       |         |
